# Supplementary material for: Laser-induced synthesis of ZIF-67: a facile approach for the fabrication of crystalline MOFs with tailored size and geometry
Source: Royal Society of Chemistry journal article supplement (doi:10.1039/c8qm00671g), 2019-01-01
Supplement: c8qm00671g1.pdf [file c8qm00671g1.pdf]

## Supplementary Information

### Laser-induced synthesis of ZIF-67: A facile approach for the fabrication of crystalline MOFs with tailored size and geometry.

Erick L. Ribeiro, Seyyed Ali Davari, Sheng Hu, Dibyendu Mukherjee\*, Bamin Khomami\*

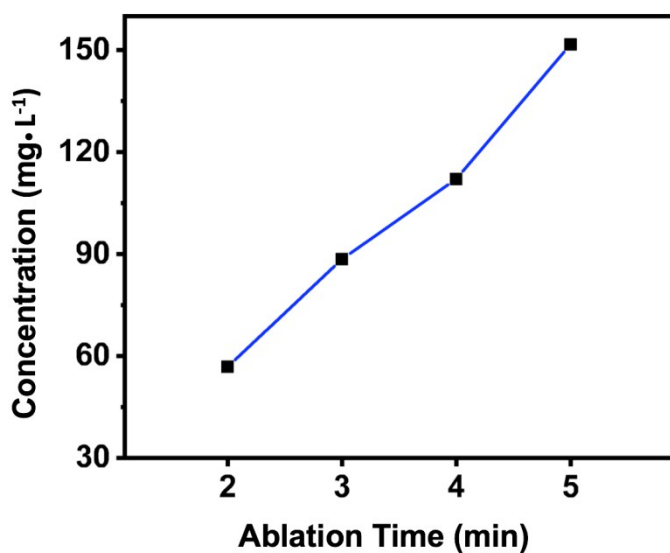

**Figure S1-** Concentration of Cobalt obtained from the ICP-OES analysis as a function of ablation time.

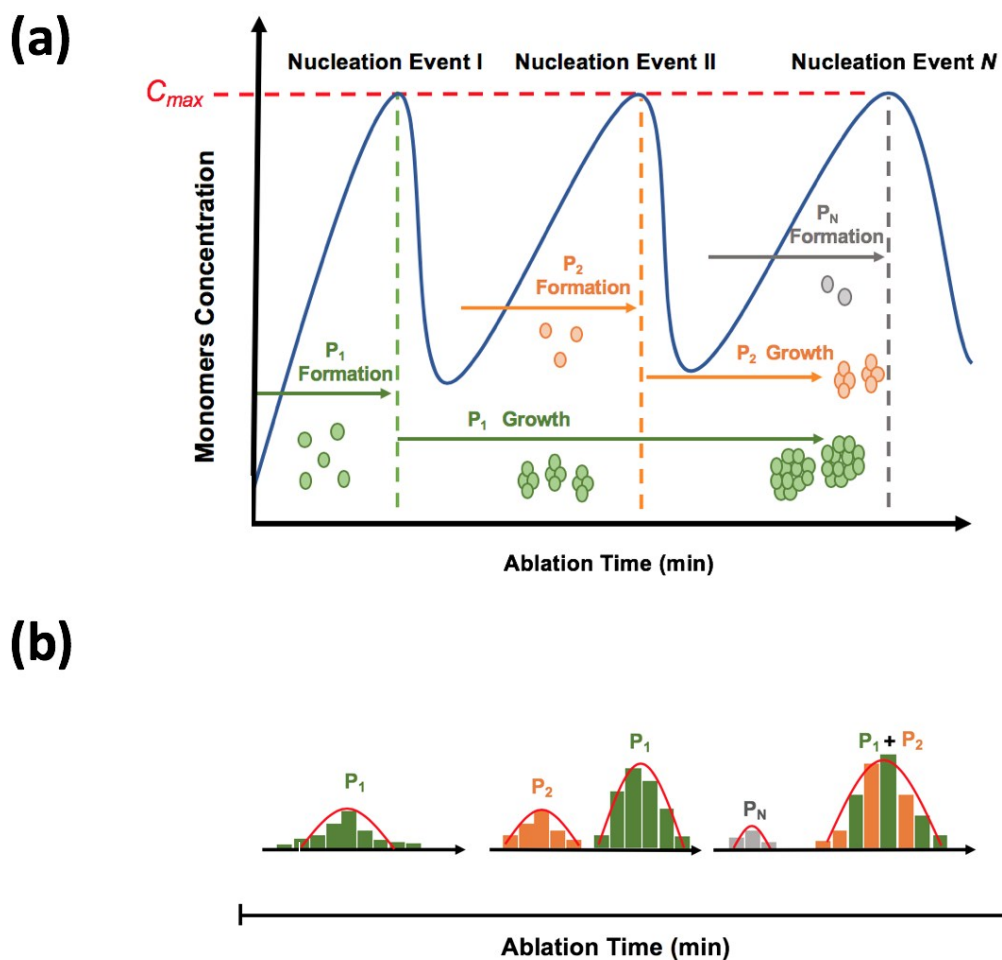

**Figure S2-** Proposed **(a)** sequence of nucleation events and **(b)** Expected evolution of overall framework size distribution for the increase in ablation time at a constant Hmim concentration.
